# Supplementary figures and images for: Acid and base strength variations: rationalization for cyclic amine bases and acidic aqua cations
Source: Royal Society of Chemistry journal article supplement (doi:10.1039/d1dt02940a), 2021-01-01

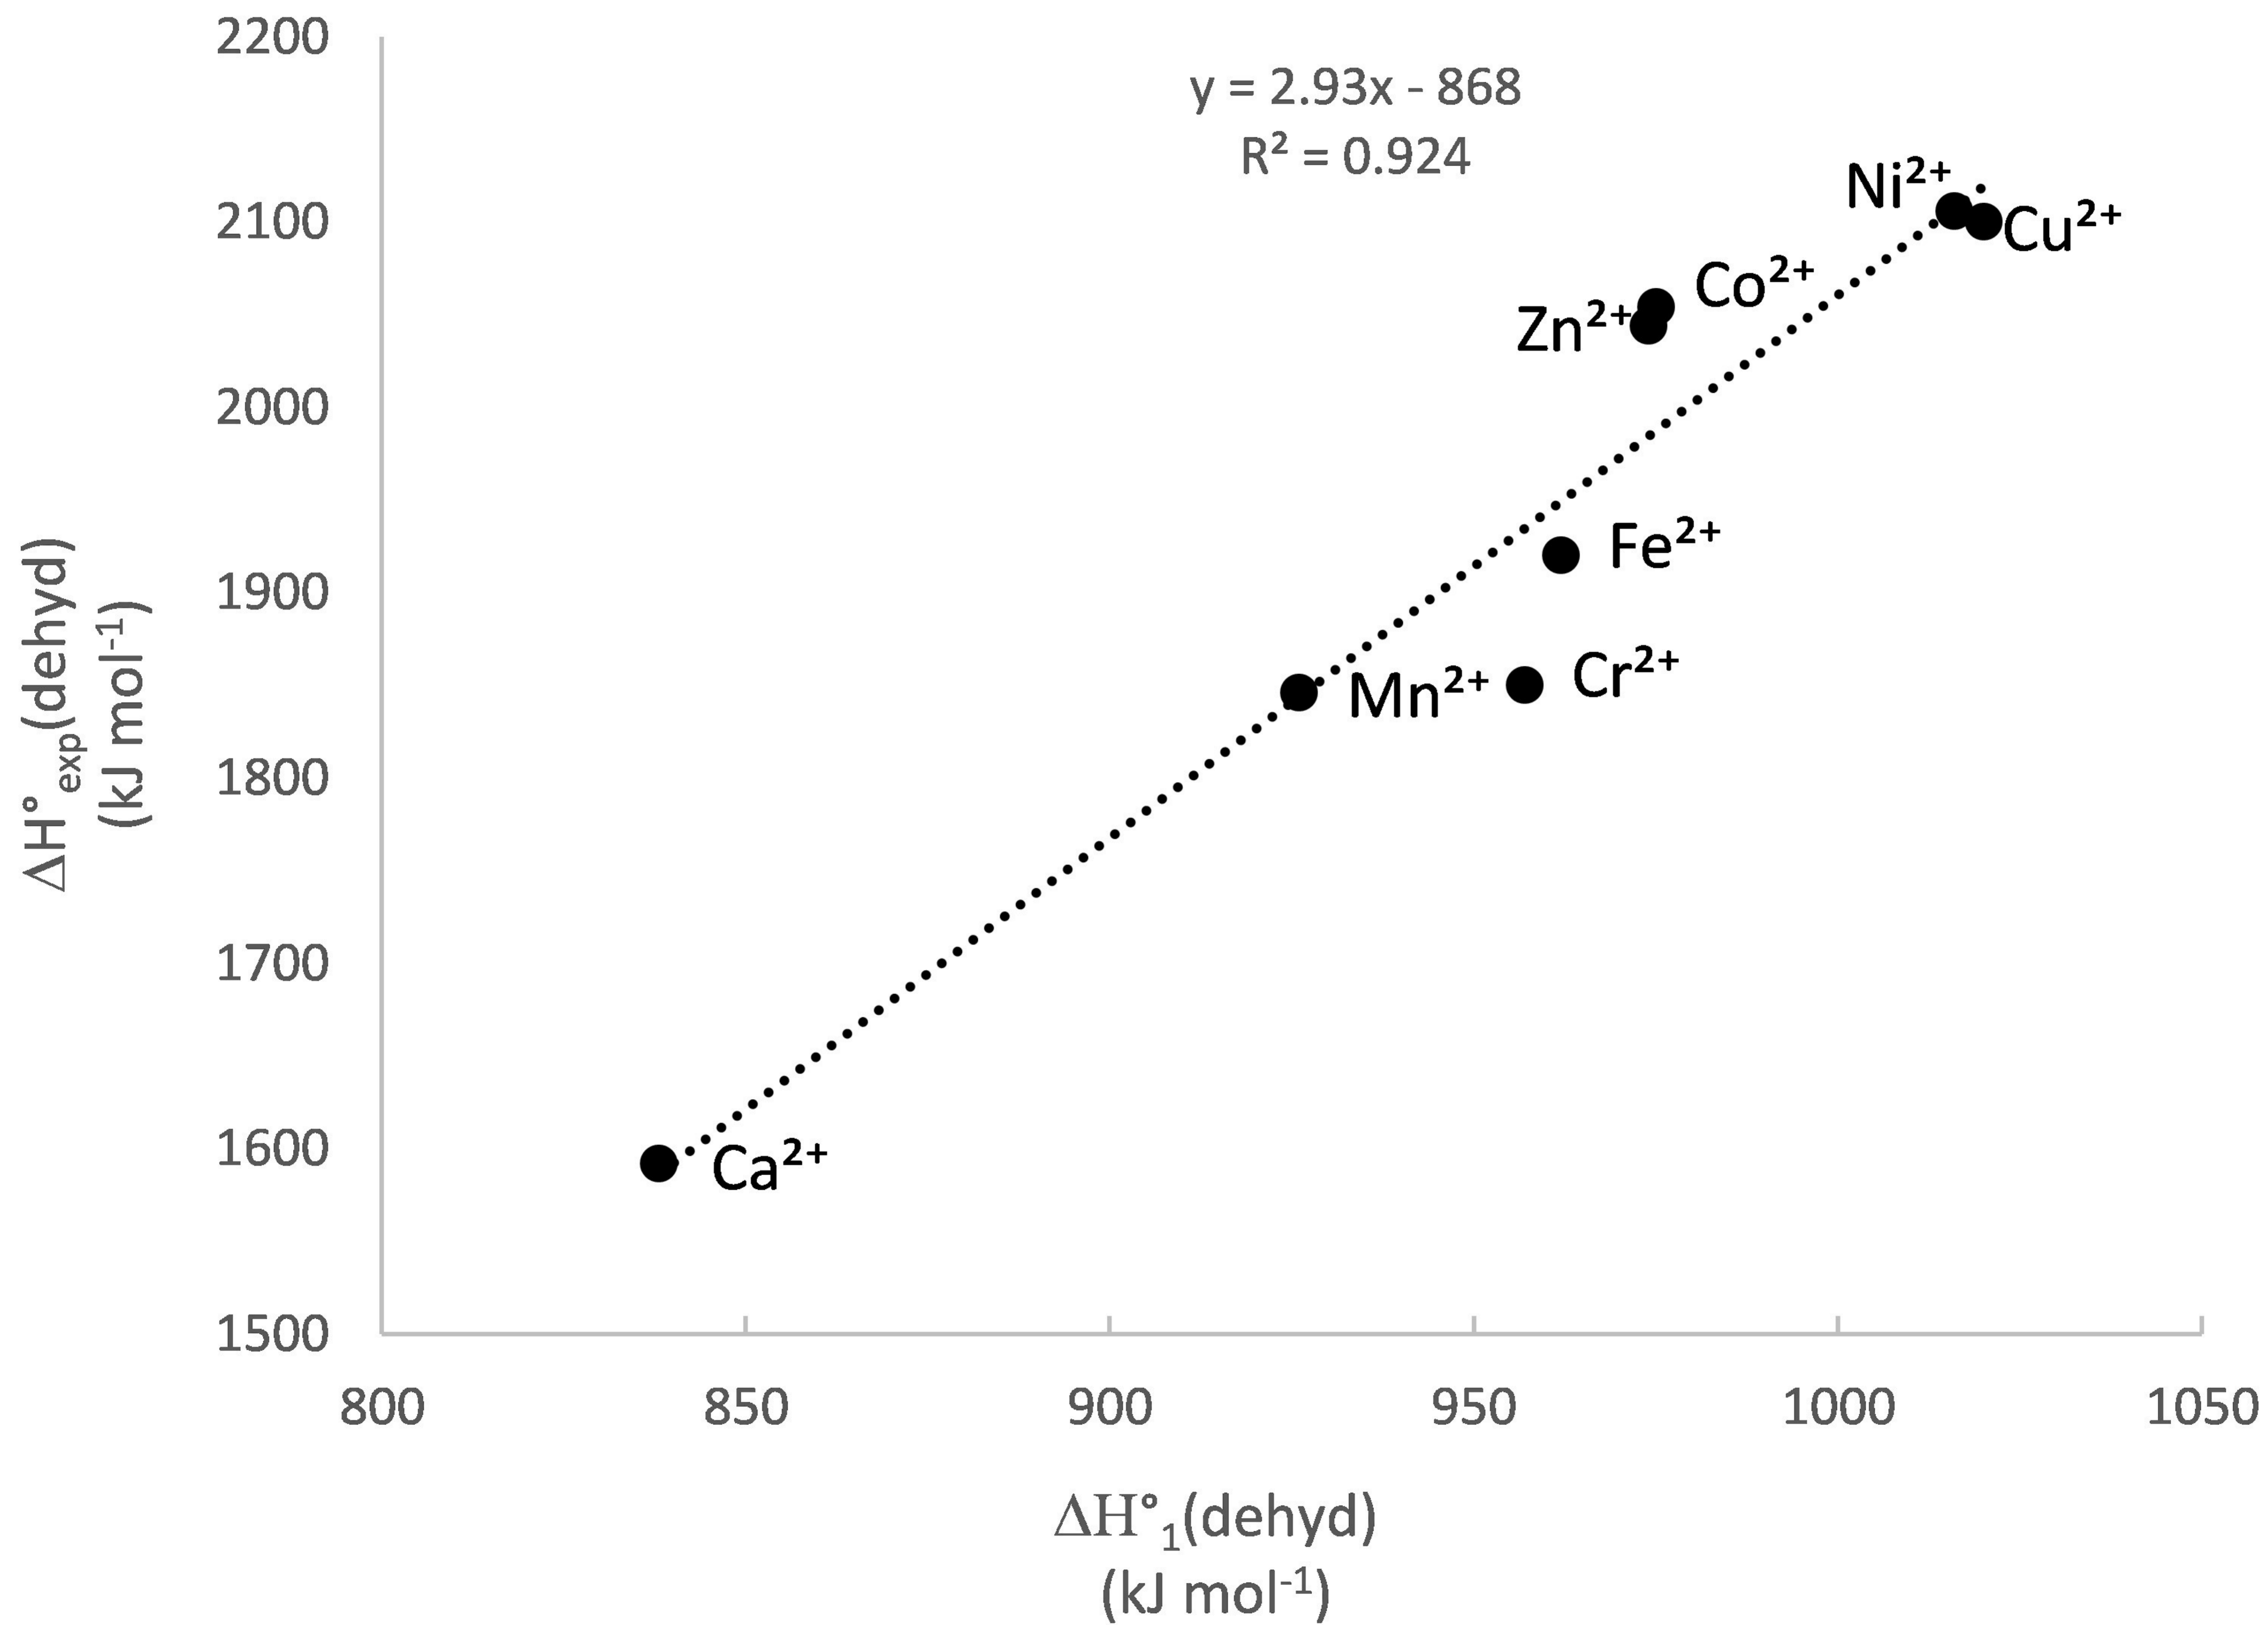

Supplement: d1dt02940a2.pdf [file d1dt02940a2.pdf]

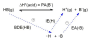

Supplement: d1dt02940a3.pdf [file d1dt02940a3.pdf]

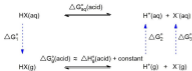

Supplement: d1dt02940a4.pdf [file d1dt02940a4.pdf]
